# Supplementary material for: Lateral thermokarst patterns in permafrost peat plateaus in northern Norway
Source: Copernicus journal article supplement (doi:10.5194/tc-15-3423-2021), 2021-07-22
Supplement: Supplementary file 1 [file SnowValues.xlsx]

## Sheet: Tops only
Mid-March Snow depths - Suossjavri
Logger	2016	2017	2018
A	10	13	25
B	20	20	40
C	20	20	40
D	22	27	40
E	25	29	45
F	35	30	50
Values in cm
