# Supplementary material for: Lateral thermokarst patterns in permafrost peat plateaus in northern Norway
Source: Copernicus journal article supplement (doi:10.5194/tc-15-3423-2021), 2021-07-22
Supplement: Supplementary file 1 [file tc-15-3423-2021-supplement.zip]

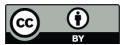

*Supplement of*

## **Lateral thermokarst patterns in permafrost peat plateaus in northern Norway**

**Léo C. P. Martin et al.**

*Correspondence to:* Léo Martin ([leo.doug.martin@gmail.com](mailto:leo.doug.martin@gmail.com)) and Sebastian Westermann ([sebastian.westermann@geo.uio.no](mailto:sebastian.westermann@geo.uio.no))

- tc-15-3423-2021-supplement-title-page.pdf
- SnowValues.xlsx
- Su\_d15.tif
- Su\_d18.tif
- readme.txt

The copyright of individual parts of the supplement might differ from the article licence.
